# Supplementary figures and images for: A bivalent inhibitor against TDRD3 to suppress phase separation of methylated G3BP1
Source: Royal Society of Chemistry journal article supplement (doi:10.1039/d3cc04654k), 2023-12-15

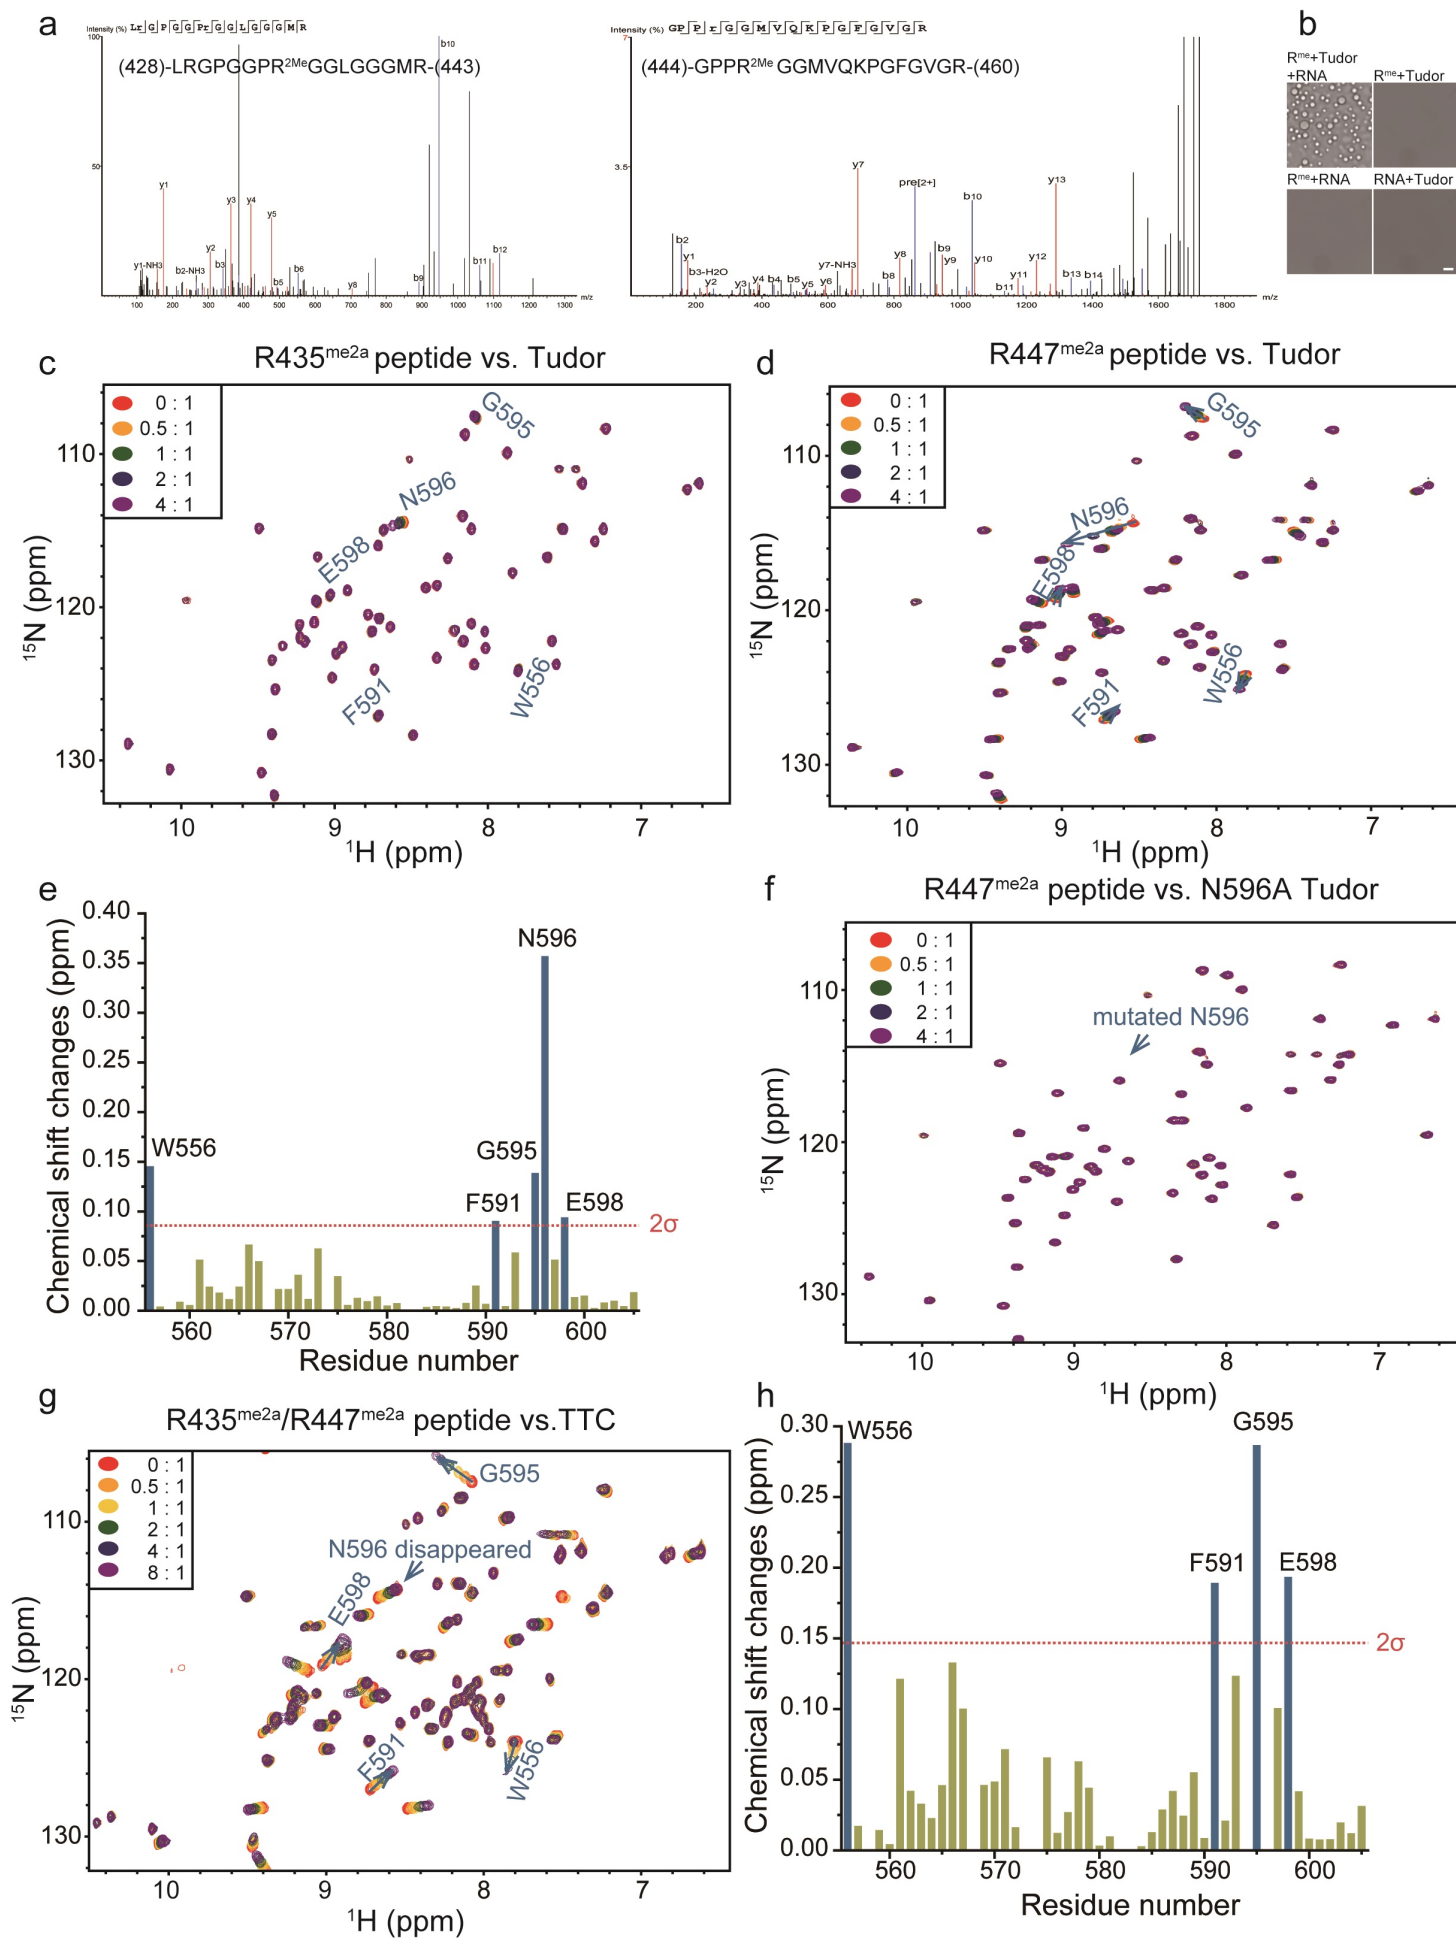

Supplement: d3cc04654k3.pdf [file d3cc04654k3.pdf]

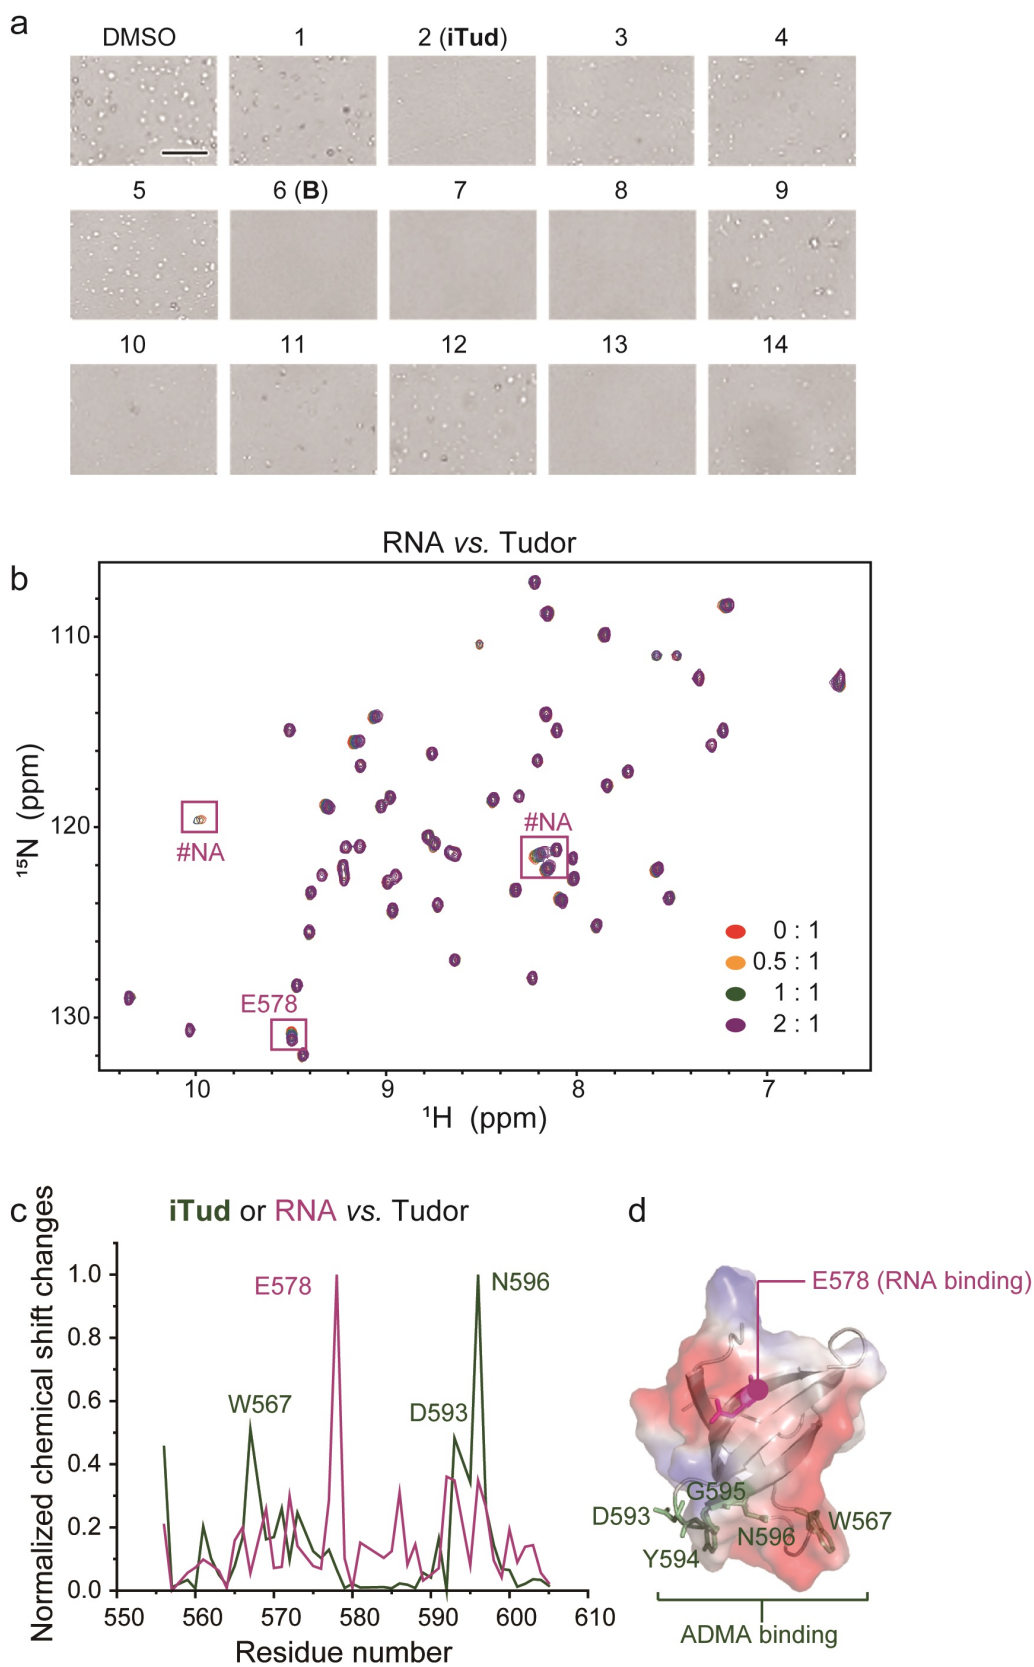

Supplement: d3cc04654k4.pdf [file d3cc04654k4.pdf]

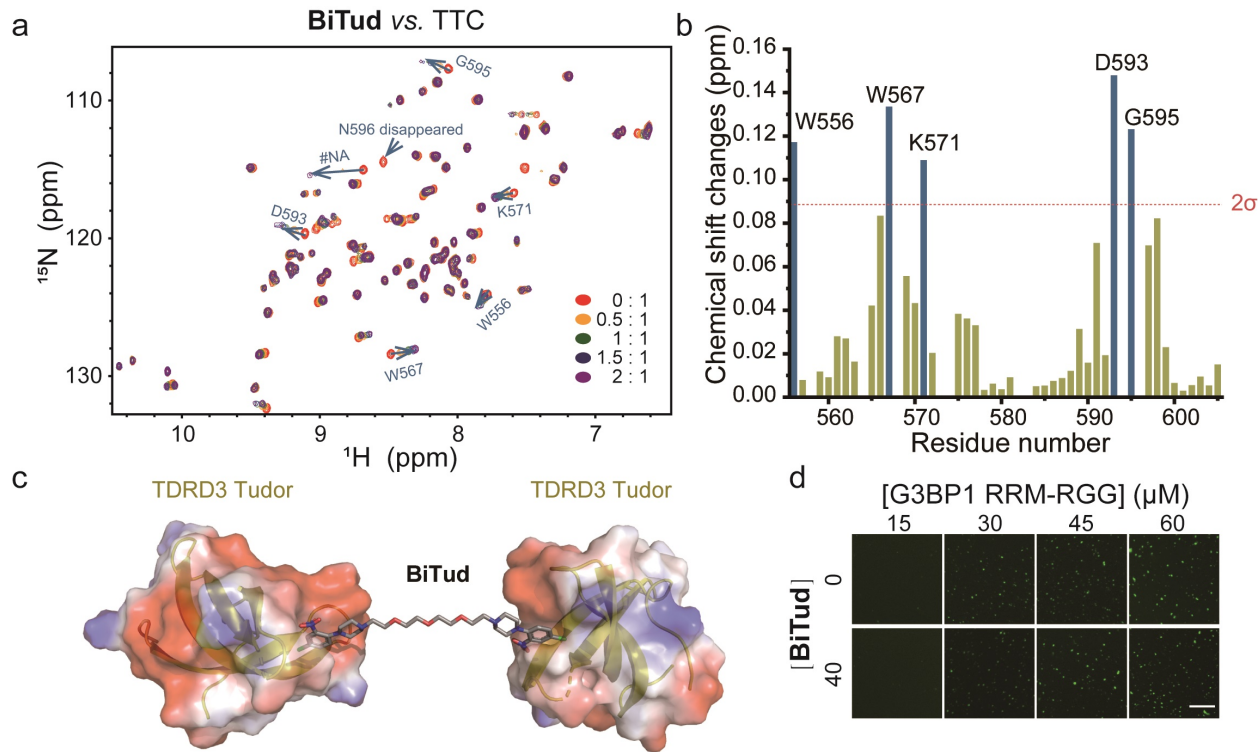

Supplement: d3cc04654k5.pdf [file d3cc04654k5.pdf]

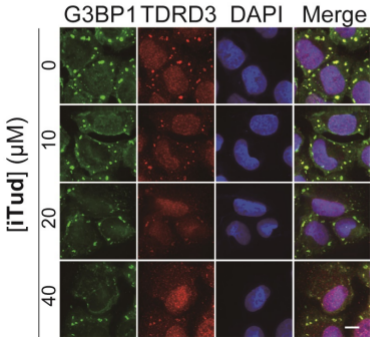

Supplement: d3cc04654k6.pdf [file d3cc04654k6.pdf]
